# Supplementary material for: T-cell immune adaptor SKAP1 regulates the induction of collagen-induced arthritis in mice
Source: PubMed Central journal article supplement (PMC4965781; doi:10.1016/j.imlet.2016.04.007), 2016-08
Supplement: mmc3.pdf [file mmc3.pdf]

## Supplementary Figure Legends

### **SFigure 1: Gating of CD4 and CD8 positive T-cells for IL-17 expression by**

**FACs.** Cells were removed from mesenteric lymph nodes and labelled with anti-CD4 (upper middle panel) or anti-CD8 (lower middle panel) followed by staining with Alexa APC-Fluor 405 conjugated secondary antibodies. Isotype antibody served as a negative control for gating against CD4 and CD8 positive subsets.

Directly conjugate anti-IL-17 stained for expression of the cytokine in permeabilised and fixed cells.

### **SFigure 2: Cellular response to CII in mice.** T-cells from spleen or

lymph nodes were removed at day 14 following CII injection and assessed intracellularly for the various cytokines by intracellular staining and flow

cytometry. **Panel A:** Comparison of IL-10, TNF- $\alpha$ , IFN- $\gamma$  and IL-2 expression. T-

cells from spleen or lymph nodes (LNs) were removed at day 14 and assessed for expression by flow cytometry. **Panel B:** Comparison of CD62L, PD-1, CTLA-4 and LAG-3 expression. Spleen (left panel) or lymph nodes (right panel). **A**

significant difference was seen CTLA-4 in spleen but not LNs ( $p > 0.05$ ).
